# Supplementary material for: Identifying the origin and contribution of pseudocapacitive sodium ion storage in tungsten disulphide nanosheets for application in sodium-ion capacitors
Source: Royal Society of Chemistry journal article supplement (doi:10.1039/c8ta07677d), 2018-01-01
Supplement: c8ta07677d1.pdf [file c8ta07677d1.pdf]

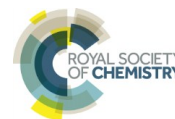

**Journal Name**

COMMUNICATION

---

**Supporting Information**

**Identifying the origin and contribution of the pseudocapacitive sodium ion storage in tungsten disulphide nanosheets for the application of sodium-ion capacitors**

Chunxia Ding,<sup>\*b</sup> Yaping Tao,<sup>c</sup> Deming Tan,<sup>d</sup> Yin Zhang,<sup>a</sup> Faxing Wang,<sup>d</sup> and Feng Yu<sup>\*a</sup>

<sup>a</sup> School of Chemistry, Physics and Mechanical Engineering, Science and Engineering Faculty, Queensland University of Technology, Brisbane, Australia. Email: feng.yu@hdr.qut.edu.au

<sup>b</sup> College of Science, Hunan Agricultural University, Changsha, Hunan 410128, China. Email: dcxxys@hunau.edu.cn

<sup>c</sup> College of Physics and Electronic Information, Luoyang Normal University, Luoyang 471022, China.

<sup>d</sup> Department of Chemistry and Food Chemistry, Technische Universität Dresden, 01062 Dresden, Germany.

Email: faxing.wang@tu-dresden.de.

---

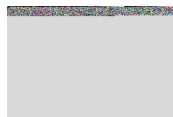

## Supplementary Figures

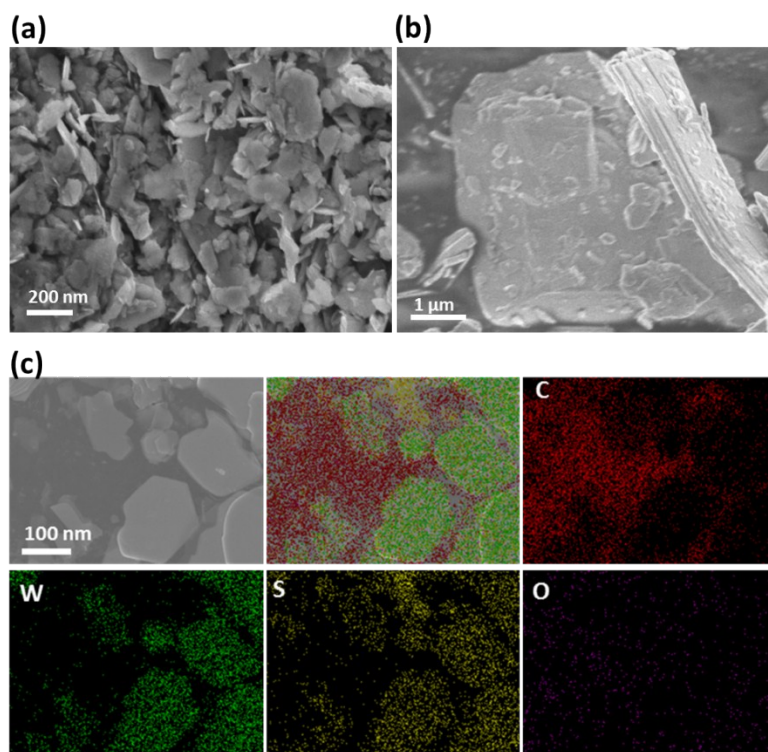

**Supplementary Figure S1.** (a) SEM images of the (a) WS<sub>2</sub> nanosheets and (b) bulk WS<sub>2</sub>. (c) The corresponding elemental mapping images of the WS<sub>2</sub> nanosheets.

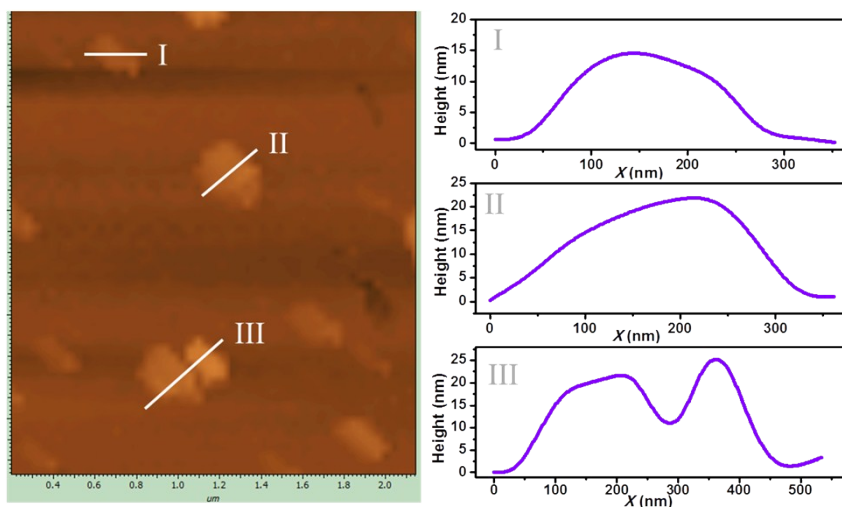

**Supplementary Figure S2.** The atomic force microscopy (AFM) image of the WS<sub>2</sub> sample and the corresponding height profile.

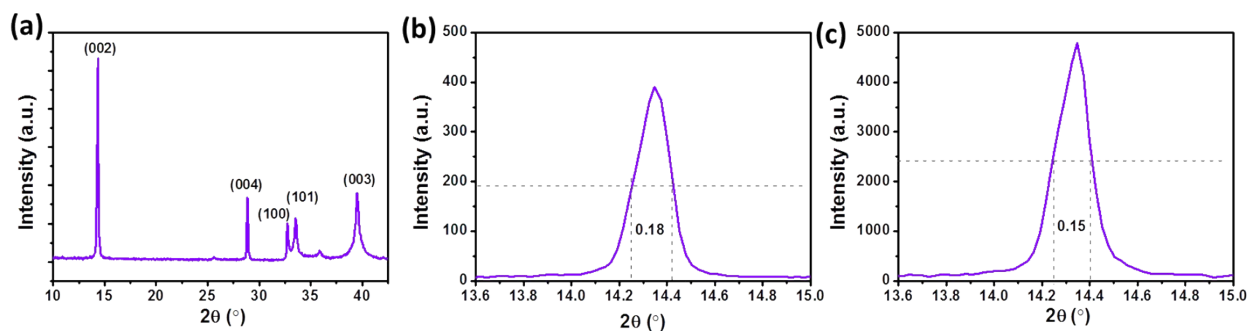

**Supplementary Figure S3.** (a) The XRD pattern of the WS<sub>2</sub> nanosheets. The full width at half maximum (FWHM) of (002) peak for (b) the WS<sub>2</sub> nanosheets and (c) bulk WS<sub>2</sub>. Except for the slightly different FWHM and intensity of (002) peak, there are almost no big differences between our WS<sub>2</sub> nanosheets (with the thicknesses of 20-30 layers) and the bulk WS<sub>2</sub>. This applies to many previous reported WS<sub>2</sub> nanosheets (with the thickness of >10 layers) as well.<sup>1-4</sup>

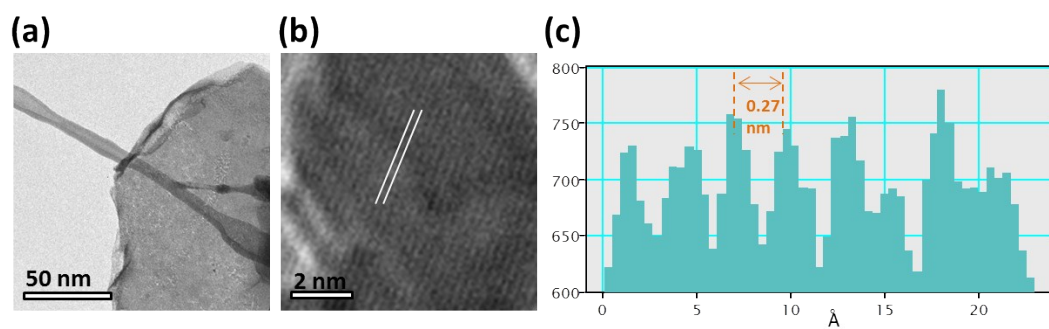

**Supplementary Figure S4.** (a, b) TEM images and (c) the corresponding lattice spacing of the WS<sub>2</sub> nanosheets.

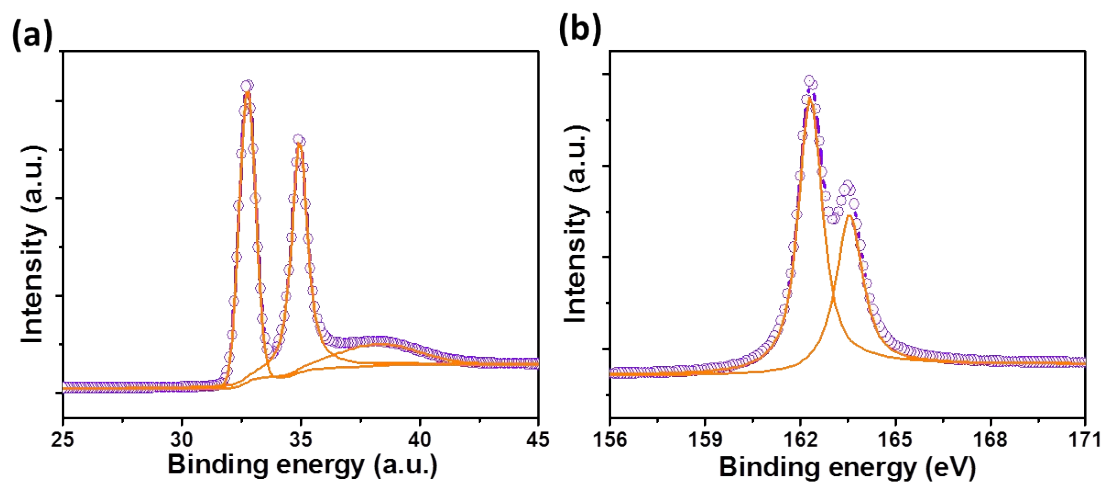

**Supplementary Figure S5.** The XPS spectrum of (a) W 4f and (b) S 2p for the WS<sub>2</sub> nanosheets.

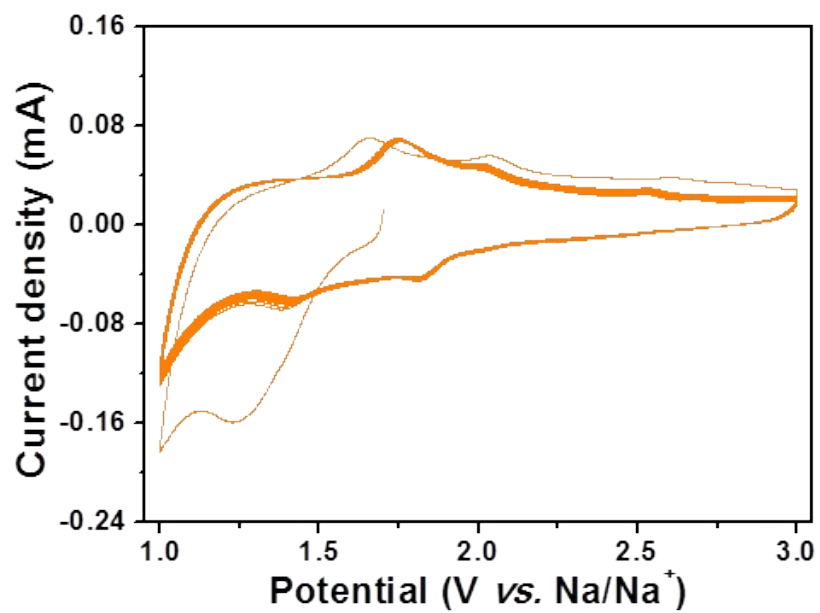

**Supplementary Figure S6.** The CV curves of the electrode based on WS<sub>2</sub> nanosheets at a sweep rate of 3 mV s<sup>-1</sup>.

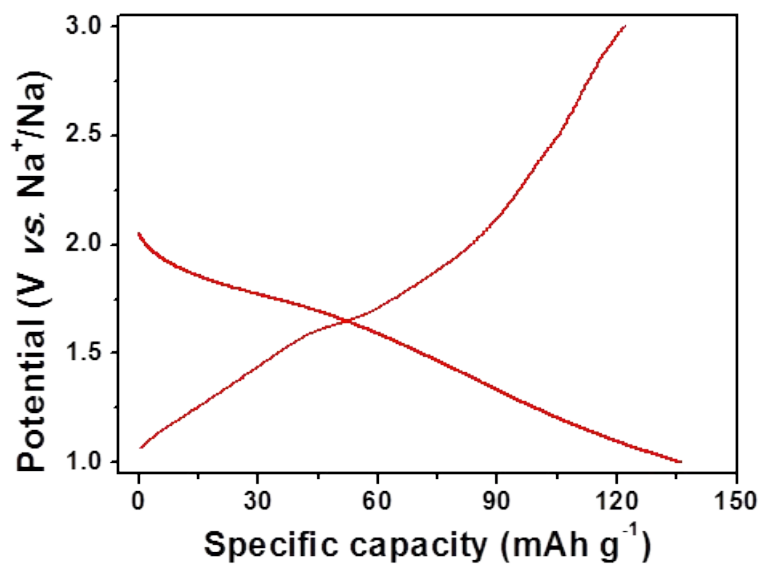

**Supplementary Figure S7.** The initial charge/discharge curves of the electrode based on WS<sub>2</sub> nanosheets at a current density of 0.1 A g<sup>-1</sup>.



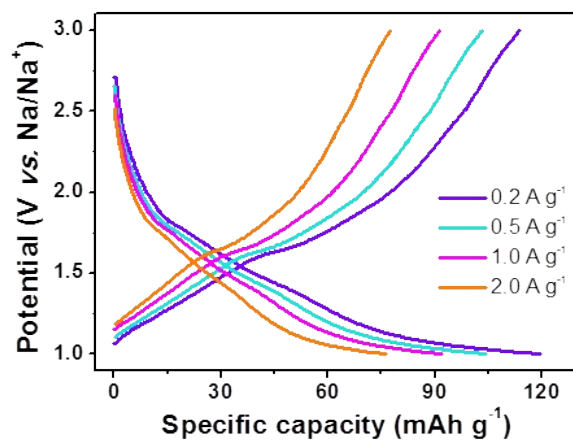

**Supplementary Figure S8.** The rate capability of the electrode based on WS<sub>2</sub> nanosheets.

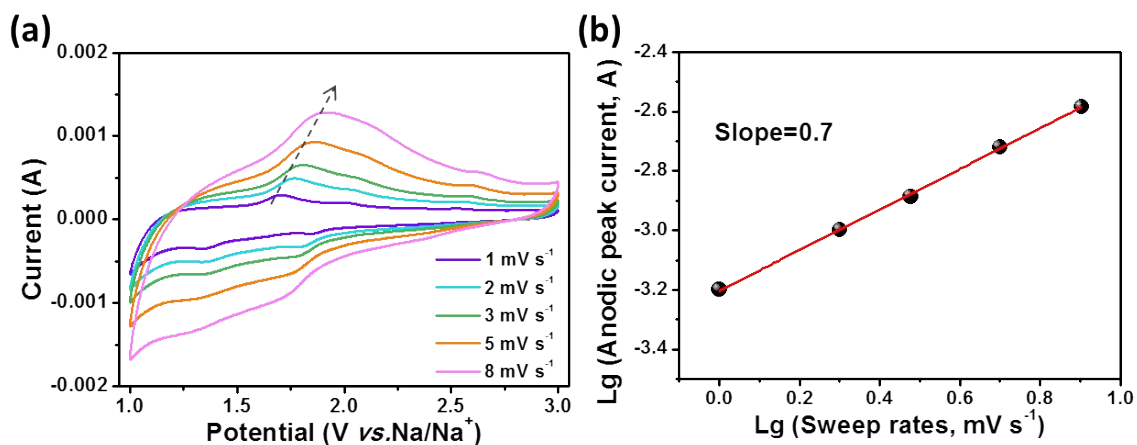

**Supplementary Figure S9.** The CV curves of the electrode based on the WS<sub>2</sub> nanosheets at various sweep rates. (b) The determination of the  $b$ -value at cathodic peak regimes. The value of  $b$  can be determined from the slope of  $\log$  (peak current) versus  $\log$  (sweep rate) as following the equation of  $i = av^b$ , in which  $a$  and  $b$  are constants. The  $b$  value of 0.5 indicates diffusion-controlled charge storage and the value of 1 suggests a capacitive (or pseudocapacitive) charge-storage mechanism. Here the  $b$  value calculated at the anodic peak regimes was estimated to be 0.7, suggesting the combination of a capacitance-controlled current and a diffusion-controlled current. In this case, the current can be separated into capacitive ( $k_1v$ ) contribution and diffusion-controlled contribution ( $k_2v^{1/2}$ ) as follows:  $i = k_1v + k_2v^{1/2}$ . Then, the  $k_1$  and  $k_2$  contents at various potentials can be determined by plotting  $i/v^{1/2}$  versus  $v^{1/2}$ .<sup>5-8</sup>

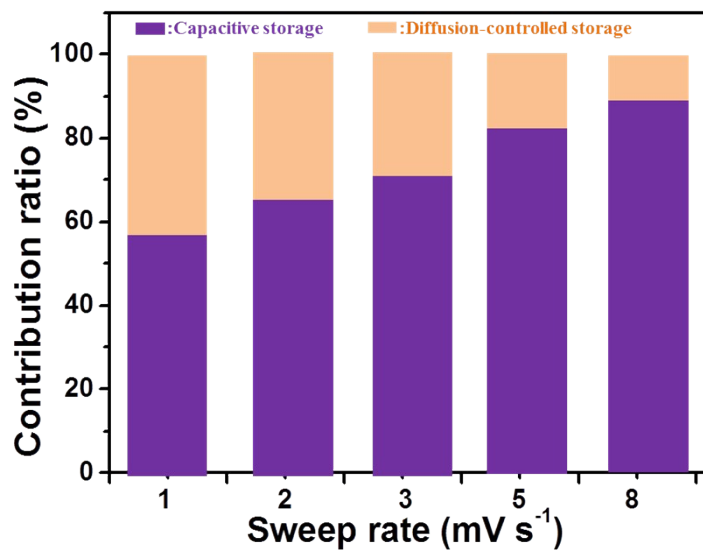

**Supplementary Figure S10.** Contribution ratios of capacitances from the surface-controlled charge storage and diffusion-limited charge storage for the electrode based on WS<sub>2</sub> nanosheets at various sweep rates.

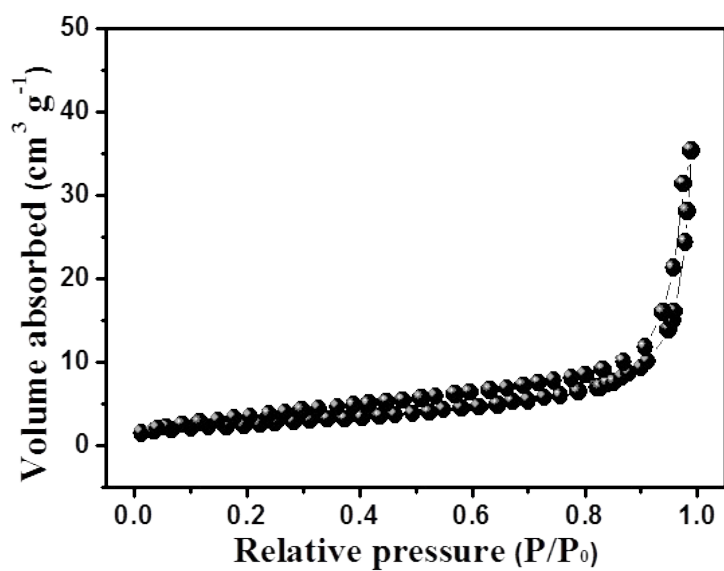

**Supplementary Figure S11.** The N<sub>2</sub> adsorption-desorption isotherm of the for the WS<sub>2</sub> nanosheets with a specific surface area of 28 m<sup>2</sup> g<sup>-1</sup>.

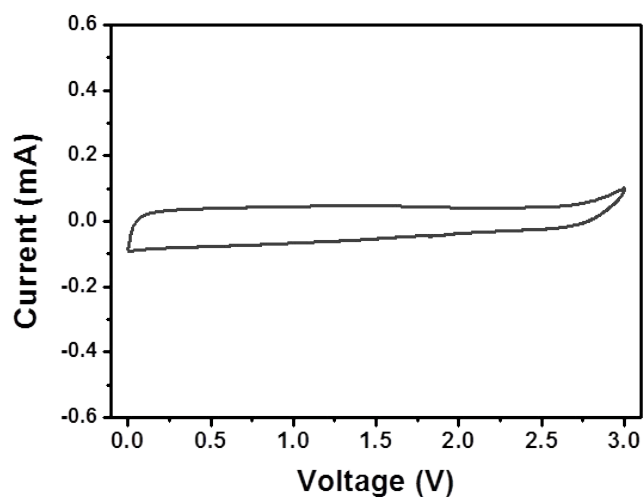

**Supplementary Figure S12.** The electrical-double-layer typed capacitive test in a standard ionic liquid electrolyte (EMI-BF<sub>4</sub>)<sup>9</sup> for a symmetrical supercapacitor based on the WS<sub>2</sub> nanosheets as electrodes. The specific capacitance was calculated to be about 1.95 F g<sup>-1</sup>. This EDLC contribution is low since the specific capacitance is proportional to the specific surface area to a certain extent.<sup>10</sup>

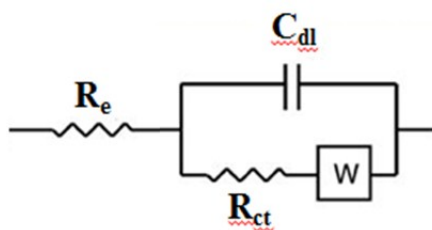

**Supplementary Figure S13.** The used equivalent circuit for fitting impedance spectra of the electrode based on the  $WS_2$  nanosheets in the potential range of 1–3V vs.  $Na/Na^+$ .

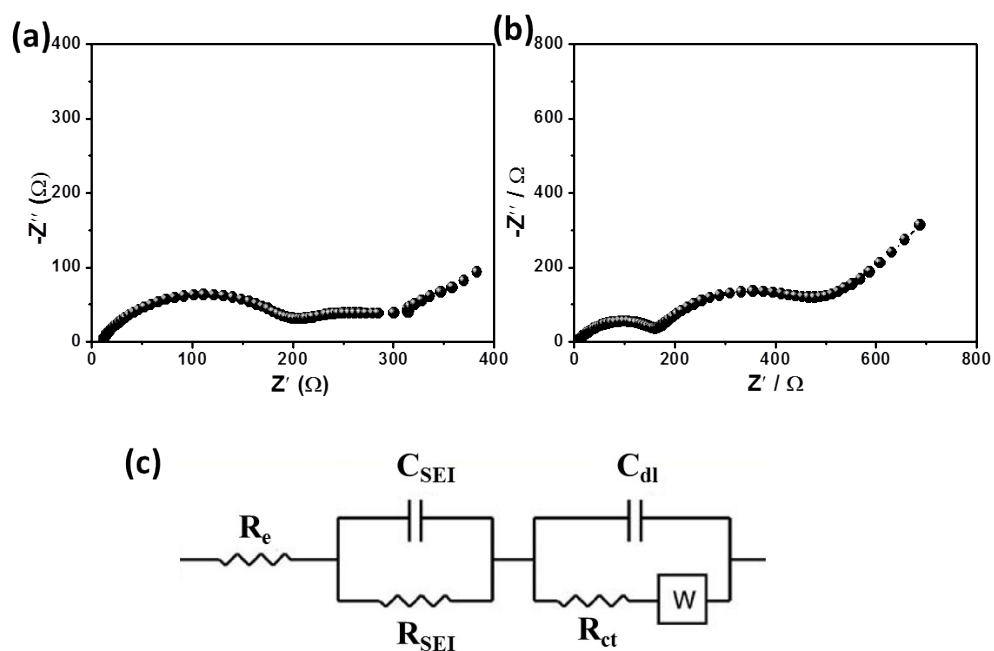

**Supplementary Figure S14.** Nyquist plots of the electrode based on the WS<sub>2</sub> nanosheets was discharged to the (a) 0.5 V and (b) 0.1 V vs. Na/Na<sup>+</sup>. (c) The used equivalent circuit for fitting impedance spectra.

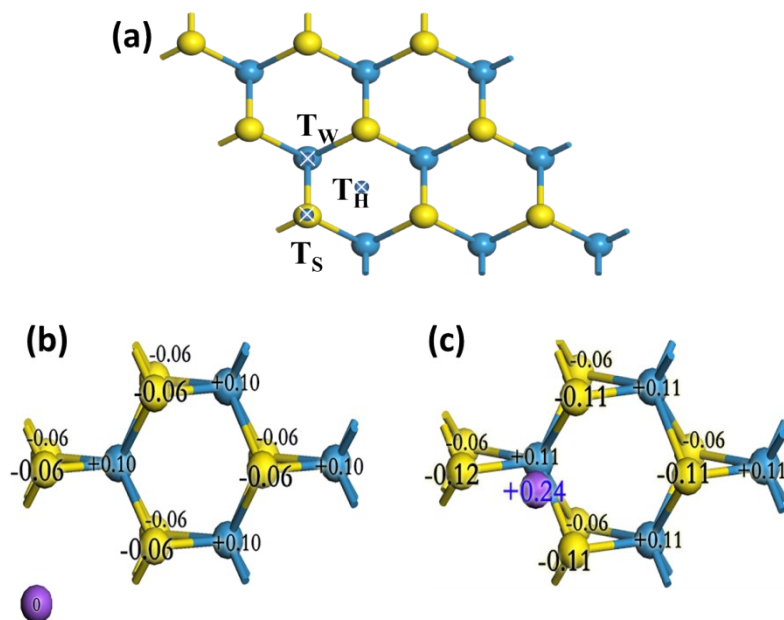

**Supplementary Figure S15.** (a) Schematic illustration of the different site for surface Na ion storage. Hirshfeld charges distribution (b) before and (c) after Na adsorption. The yellow, blue and purple spheres are the S, W and Na atom, respectively.



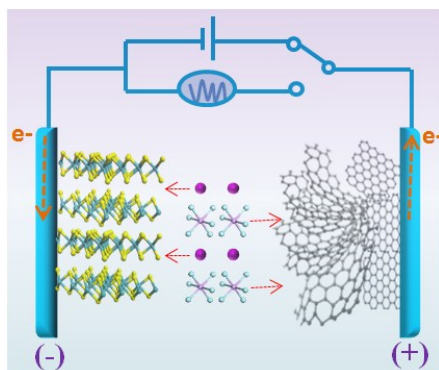

**Supplementary Figure S16.** Schematic illustration of the fabricated Na-ion capacitor based on the WS<sub>2</sub> nanosheets as the anode.

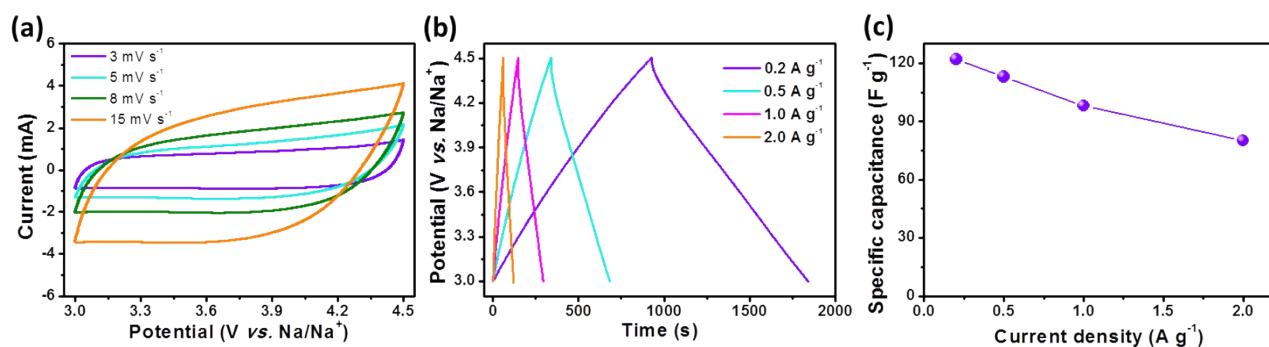

**Supplementary Figure S17.** The electrochemical behaviours of the used cathode for the WS<sub>2</sub> based Na ion capacitor. (a) The CV curves at various sweep rates. (b) Galvanostatic charge/discharge profiles and (c) specific capacitances at various current densities. The mass ratio of the used cathode and WS<sub>2</sub> anode was obtained according to the following equation:  $Q_+ = Q_- = m_+ \times U_+ \times C_+ = m_- \times U_- \times C_-$ , where Q is the capacity, U is the potential range, m is the mass of active electrode, and subscripts stand for the cathode and anode, respectively.<sup>11,12</sup>

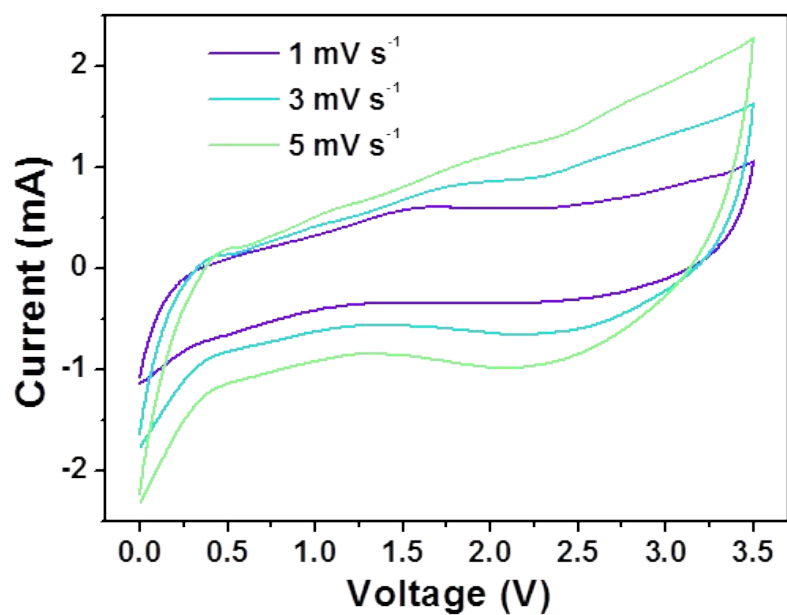

**Supplementary Figure S18.** The CV curves of the fabricated Na-ion capacitor based on WS<sub>2</sub> nanosheets as the anode at various sweep rates

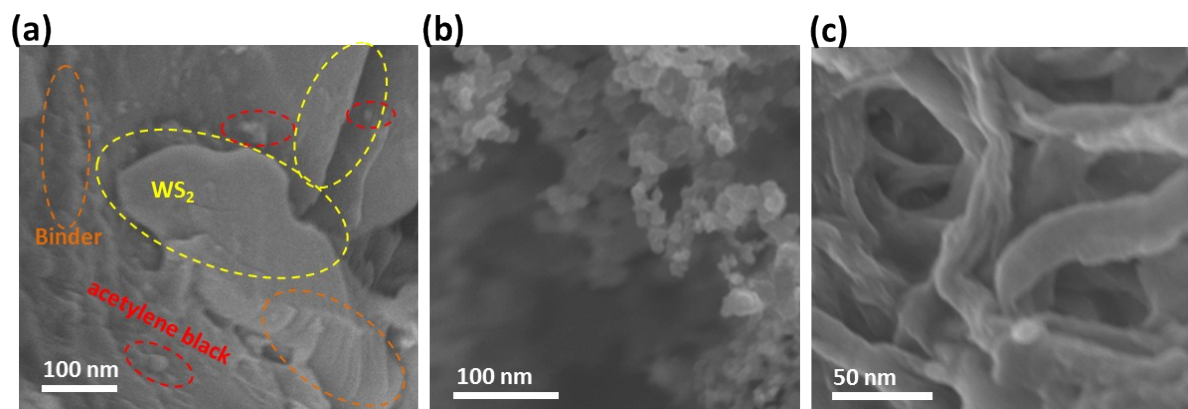

**Supplementary Figure S19.** The SEM image of (a) the WS<sub>2</sub> anode for the Na-ion capacitor after 6000 cycles, (b) the acetylene back and (c) the binder

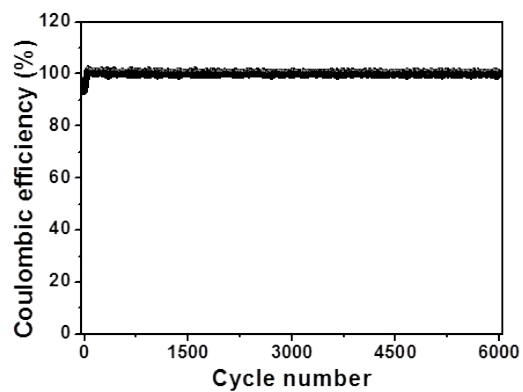

**Supplementary Figure S20.** The coulombic efficiencies of the fabricated Na-ion capacitor during the cycling process.

**Supplementary Table S1.** Hirshfeld charges distribution before and after Na adsorption.

|                 | WS <sub>2</sub> | T_W   |
|-----------------|-----------------|-------|
| Na <sub>1</sub> |                 | 0.23  |
| S <sub>1</sub>  | -0.06           | -0.06 |
| S <sub>2</sub>  | -0.06           | -0.11 |
| S <sub>3</sub>  | -0.06           | -0.06 |
| S <sub>4</sub>  | -0.06           | -0.1  |
| S <sub>5</sub>  | -0.06           | -0.06 |
| S <sub>6</sub>  | -0.06           | -0.11 |
| S <sub>7</sub>  | -0.06           | -0.06 |
| S <sub>8</sub>  | -0.06           | -0.11 |
| W <sub>1</sub>  | 0.1             | 0.11  |
| W <sub>2</sub>  | 0.1             | 0.11  |
| W <sub>3</sub>  | 0.1             | 0.11  |
| W <sub>4</sub>  | 0.1             | 0.11  |

**References**

- 1 X. Mao, Y. Xu, Q. Xue, W. Wang and D. Gao, *Nanoscale Res. Lett.*, 2013, **8**, 430–435.
- 2 Y. Hongjian, Y. Yong, L. Jianghao, M. Peiyan, W. Yucheng, Z. Fan and F. Zhengyi, *J. Mater. Chem. A*, 2015, **3**, 19439–19444.
- 3 Q. Liu, X. Li, Z. Xiao, Y. Zhou, H. Chen, A. Khalil, T. Xiang, J. Xu, W. Chu, X. Wu, J. Yang, C. Wang, Y. Xiong, C. Jin, P. M. Ajayan and L. Song, *Adv. Mater.*, 2015, **27**, 4837–4844.
- 4 D. Zheng, Y. P. Wu, Z. Y. Li and Z. B. Cai, *RSC Adv.*, 2017, **7**, 14060–14068.
- 5 T. Brezesinski, J. Wang, S. H. Tolbert and B. Dunn, *Nat. Mater.*, 2010, **9**, 146–151.



- 
- 6 V. Augustyn, J. Come, M. A. Lowe, J. W. Kim, P. L. Taberna, S. H. Tolbert, H. D. Abruna, P. Simon and B. Dunn, *Nat. Mater.*, 2013, **12**, 518–522.
  - 7 H. S. Kim, J. B. Cook, H. Lin, J. S. Ko, S. H. Tolbert, V. Ozolins and B. Dunn, *Nat. Mater.*, 2017, **16**, 454–460.
  - 8 F. Wang, X. Wu, X. Yuan, Z. Liu, Y. Zhang, L. Fu, Y. Zhu, Q. Zhou, Y. Wu and W. Huang, *Chem. Soc. Rev.*, 2017, **46**, 6816–6854.
  - 9 C. Zhong, Y. Deng, W. Hu, J. Qiao, L. Zhang and J. Zhang, *Chem. Soc. Rev.*, 2015, **44**, 7484–7539.
  - 10 S. Tabata, Y. Isshiki and M. Watanabe, *J. Electrochem. Soc.*, 2008, **155**, K42–K42.
  - 11 F. Wang, X. Wang, Z. Chang, X. Wu, X. Liu, L. Fu, Y. Zhu, Y. Wu and W. Huang, *Adv. Mater.*, 2015, **27**, 6962–6968.
  - 12 F. Wang, C. Wang, Y. Zhao, Z. Liu, Z. Chang, L. Fu, Y. Zhu, Y. Wu and D. Zhao, *Small*, 2016, **12**, 6207–6213.
-
